# Supplementary material for: A regulatory phosphorylation site on Mec1 controls chromatin occupancy of RNA polymerases during replication stress
Source: PubMed Central journal article supplement (PMC8561635; doi:10.15252/embj.2021108439), 2021-09-27

### DNA combing Source Data for Figure\_3C

WT  
90 min HU

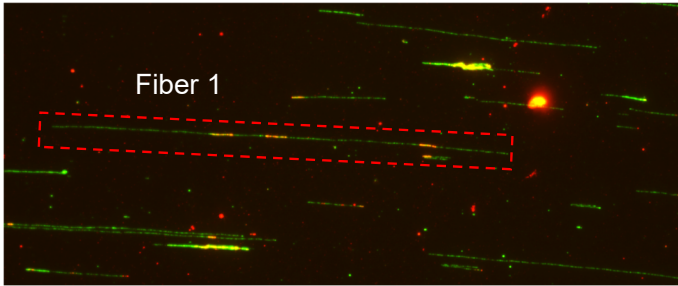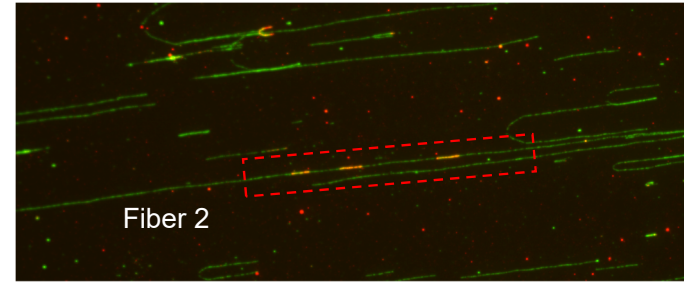

WT  
180 min HU

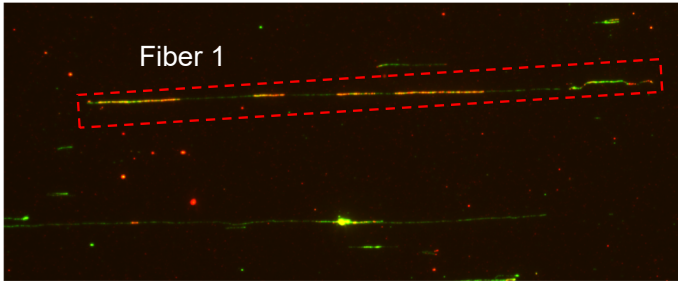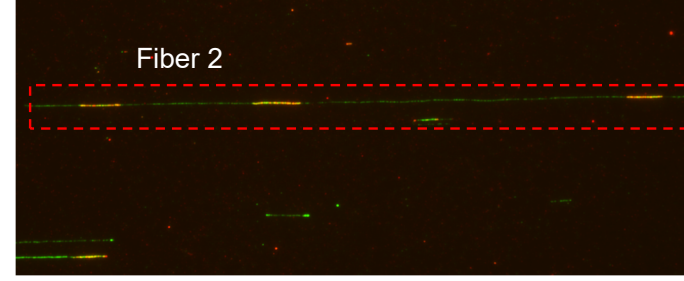

anti-ssDNA (green),  
anti-BrdU (red)

*mec1-S1991A*  
90 min HU

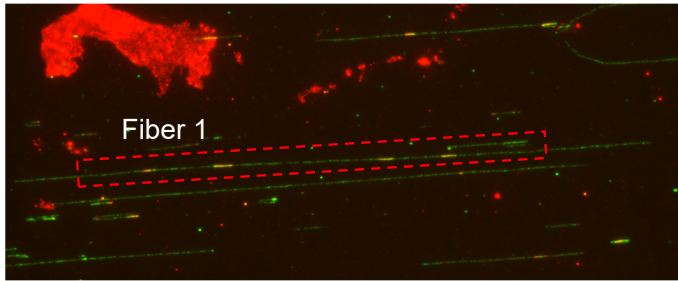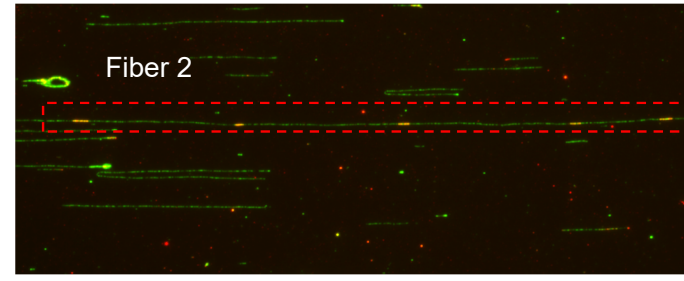

*mec1-S1991A*  
180 min HU

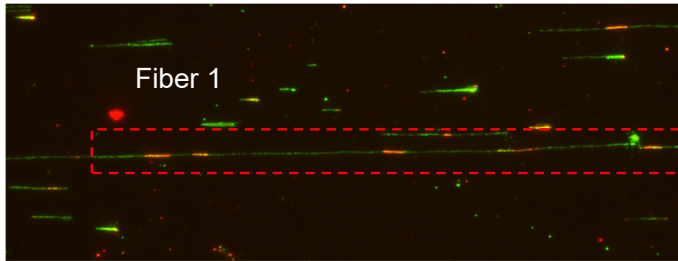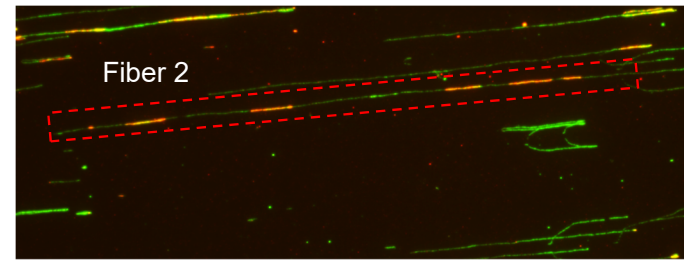

Supplement: EMBJ-40-e108439-s008.pdf [file EMBJ-40-e108439-s008.pdf]
